# Supplementary material for: Combine with RNA-seq Reveals the Effect of Melatonin in the Synthesis of Melanin in Primary Melanocytes of Silky Fowls Black-Bone Chicken
Source: MDPI journal article supplement (doi:10.3390/genes14081648), 2023-08-18
Supplement: s1 [file s1]

**Table S2.** Summary statistics of clean reads mapped to the reference genome.

| Sample | Total Reads | Total Mapped Reads(%) | Unique Mapped Reads(%) | Exon(%) | Intron(%) | Intergenic (%) |
|--------|-------------|-----------------------|------------------------|---------|-----------|----------------|
| Cont_1 | 43,981,358  | 91.18                 | 89.40                  | 78.58   | 8.64      | 12.78          |
| Cont_2 | 44,297,264  | 91.35                 | 89.41                  | 77.83   | 9.44      | 12.73          |
| Cont_3 | 43,268,666  | 91.24                 | 89.21                  | 77.54   | 9.99      | 12.47          |
| MT_1   | 43,203,874  | 91.61                 | 89.85                  | 78.66   | 8.29      | 13.04          |
| MT_2   | 44,300,540  | 91.51                 | 89.69                  | 78.26   | 9.02      | 12.73          |
| MT_3   | 42,560,828  | 91.85                 | 89.87                  | 78.61   | 8.09      | 13.30          |
