# Supplementary material for: Combine with RNA-seq Reveals the Effect of Melatonin in the Synthesis of Melanin in Primary Melanocytes of Silky Fowls Black-Bone Chicken
Source: MDPI journal article supplement (doi:10.3390/genes14081648), 2023-08-18
Supplement: s1 [file s1]

**Table S1.** Summary statistics for quality control of the sequencing data.

| Sample | Raw<br>Reads | Raw<br>Bases(G) | Clean<br>Reads | Clean<br>Bases(G) | Q20(%) | Q30(%) | GC<br>Content(%) |
|--------|--------------|-----------------|----------------|-------------------|--------|--------|------------------|
| Cont_1 | 45,171,176   | 6.78            | 43,981,358     | 6.60              | 97.20  | 92.78  | 51.23            |
| Cont_2 | 45,356,912   | 6.80            | 44,297,264     | 6.64              | 97.31  | 93.00  | 51.12            |
| Cont_3 | 44,456,700   | 6.67            | 43,268,666     | 6.49              | 97.11  | 92.55  | 51.35            |
| MT_1   | 44,173,684   | 6.63            | 43,203,874     | 6.48              | 97.27  | 92.83  | 50.44            |
| MT_2   | 45,368,272   | 6.81            | 44,300,540     | 6.65              | 97.49  | 93.39  | 51.00            |
| MT_3   | 43,558,374   | 6.53            | 42,560,828     | 6.38              | 97.50  | 93.36  | 50.56            |
